# Supplementary material for: Effects of a synbiotic as an antibiotic alternative on behavior, production performance, cecal microbial ecology, and jejunal histomorphology of broiler chickens under heat stress
Source: PLoS One. 2022 Sep 28;17(9):e0274179. doi: 10.1371/journal.pone.0274179 (PMC9518870; doi:10.1371/journal.pone.0274179)
Supplement: S1 Data — (XLSX) [file pone.0274179.s001.xlsx]

## Sheet: Sheet1
Table (2)
Day 14
Pen	Treatment	Age (day)	BW (g)	FI (g)	BWG (g)	FCR
1	Control 1	14	401.28	371.13	365.61	1.0151
2	Control 2	14	434.62	449.13	397.79	1.12906
3	Control 3	14	442.48	445.04	406.08	1.09594
4	Control 4	14	406.68	405.14	369.78	1.09562
5	Control 5	14	423.94	427.68	387.44	1.10386
6	Control 6	14	438.22	454.54	401.82	1.1312
7	Control 7	14	463.24	460.4	427.14	1.07787
8	Control 8	14	447.8	448.96	411.9	1.08997
1	BMD 1	14	423.34	384.97	387.05	0.994626
2	BMD 2	14	437.08	357.9	380.65	0.940234
3	BMD 3	14	421.34	376.45	375.12	1.00355
4	BMD 4	14	422.9	386.72	386.9	1.09953
5	BMD 5	14	446.7	393.62	411.5	0.956549
6	BMD 6	14	430.9	438.33	394.1	1.11222
7	BMD 7	14	441.1	398.94	402.6	0.990909
8	BMD 8	14	405.6	389.78	428.15	0.991303
1	SYN 1	14	472.4	326.66	436.33	0.748654
2	SYN 2	14	444.3	413.19	407.78	1.01327
3	SYN 3	14	438.5	406.44	402	1.01104
4	SYN 4	14	423.4	448.74	387.5	1.15804
5	SYN 5	14	431	413.35	394.46	1.04789
6	SYN 6	14	427.5	396.44	391.3	1.01314
7	SYN 7	14	463	443.85	426.71	1.04017
8	SYN 8	14	466.22	417.7	429.84	0.971757
Day 28
Pen	Treatment	Age (day)	BW (g)	FI (g)	BWG (g)	FCR
1	Control 1	28	1300	1345	898.72	1.49657
2	Control 2	28	1455.5	1656	1020.88	1.62213
3	Control 3	28	1412.4	1485	969.92	1.53105
4	Control 4	28	1388.6	1430	981.92	1.45633
5	Control 5	28	1348.4	1525	924.46	1.64961
6	Control 6	28	1410.3	1570	972.08	1.61509
7	Control 7	28	1412.4	1645	949.16	1.73311
8	Control 8	28	1440.5	1565	992.7	1.57651
1	BMD 1	28	1380.4	1410	957.06	1.47326
2	BMD 2	28	1372	1280	954.92	1.34043
3	BMD 3	28	1353	1300	941.66	1.38054
4	BMD 4	28	1394.4	1385	971.5	1.42563
5	BMD 5	28	1598	1640	1151.3	1.42448
6	BMD 6	28	1461	1240	1030.1	1.20377
7	BMD 7	28	1402.8	1420	961.7	1.47655
8	BMD 8	28	1440	1270	1009.44	1.25812
1	SYN 1	28	1445	1460	972.6	1.50113
2	SYN 2	28	1461	1460	1016.7	1.43602
3	SYN 3	28	1484.2	1590	1045.7	1.52051
4	SYN 4	28	1557.5	1475	1134.1	1.30059
5	SYN 5	28	1487.5	1585	1056.5	1.50024
6	SYN 6	28	1560.5	1490	1133	1.31509
7	SYN 7	28	1478.5	1565	1015.5	1.54111
8	SYN 8	28	1503	1535	1036.78	1.48055
Day 42
Pen	Treatment	Age (day)	BW (g)	BWG (g)	FI (g)	FCR
1	Control 1	42	2344.44	944.444	2021.11	2.14
2	Control 2	42	2253.33	897.833	2090.22	2.32807
3	Control 3	42	2460	1047.76	2031	1.93842
4	Control 4	42	2415.56	926.95	2061.11	2.22354
5	Control 5	42	2491.11	1042.71	2119.44	2.03263
6	Control 6	42	2331.11	1020.81	2267	2.22078
7	Control 7	42	2407.78	1095.38	2080.22	1.89909
8	Control 8	42	2344.44	1003.94	2079.67	2.0715
1	BMD 1	42	2404.44	1024.04	2073.44	2.02476
2	BMD 2	42	2495.56	1023.55	2032.89	1.98612
3	BMD 3	42	2363.33	1110.33	2044.44	1.84129
4	BMD 4	42	2347.78	1053.38	1910.56	1.81374
5	BMD 5	42	2485.56	987.556	2135.22	2.16213
6	BMD 6	42	2368.89	1007.89	1984.56	1.96902
7	BMD 7	42	2410	1072	2069.22	1.93024
8	BMD 8	42	2597.78	1059.77	2099	1.98062
1	SYN 1	42	2438.89	993.889	2080.33	2.09312
2	SYN 2	42	2428.89	1067.89	2160.11	2.02279
3	SYN 3	42	2461.11	1076.91	2098.56	1.94868
4	SYN 4	42	2522.22	1064.72	2017.78	1.89512
5	SYN 5	42	2778.75	1061.47	2237.88	2.10828
6	SYN 6	42	2502.22	1041.72	2071.56	1.98859
7	SYN 7	42	2488.89	1110.39	2201.22	1.98239
8	SYN 8	42	2477.78	1074.78	2087	1.9418
